# Supplementary material
Source: PubMed Central journal article supplement (PMC3733329)
Supplement: NIHMS489302-supplement-Supp_Data.pdf [file NIHMS489302-supplement-Supp_Data.pdf]

## Supplementary Online Content

Kimberly Hieftje, Ph.D., E. Jennifer Edelman, M.D., M.H.S., Deepa R. Camenga, M.D., M.H.S., Lynn E. Fiellin, M.D. Electronic Media-Based Health Interventions for Behavior Change in Youth: A Systematic Review

### **eTable 1: Summary of studies utilizing electronic media for health or safety behavior change**

This supplementary material has been provided by the authors to give readers additional information about their work.

**eTable 1: Summary of studies utilizing electronic media for health or safety behavior change**

| Source/<br>year                                     | Intervention<br>Setting/<br>Subjects                                                                                       | Media<br>Structure                                                                                                                                          | Research<br>Design                                              | Intervention/<br>Follow-<br>up/Control                                                                                                                                                                  | Outcomes                                                                                                                                                                                                                                                                     | Results/<br>Conclusions                                                                                                                                                                                                                                                                                                                      | Quality<br>Score |
|-----------------------------------------------------|----------------------------------------------------------------------------------------------------------------------------|-------------------------------------------------------------------------------------------------------------------------------------------------------------|-----------------------------------------------------------------|---------------------------------------------------------------------------------------------------------------------------------------------------------------------------------------------------------|------------------------------------------------------------------------------------------------------------------------------------------------------------------------------------------------------------------------------------------------------------------------------|----------------------------------------------------------------------------------------------------------------------------------------------------------------------------------------------------------------------------------------------------------------------------------------------------------------------------------------------|------------------|
| <b>Nutrition/Physical Activity</b>                  |                                                                                                                            |                                                                                                                                                             |                                                                 |                                                                                                                                                                                                         |                                                                                                                                                                                                                                                                              |                                                                                                                                                                                                                                                                                                                                              |                  |
| Cullen, K. W.,<br>K. Watson, et<br>al. (2005).      | 26 grade<br>schools; N =<br>1578<br>students<br>(ages 8-12;<br>46.6% male)                                                 | Computer<br>game;<br><i>Squire's<br/>Quest</i> ,<br>content<br>includes<br>activities<br>promoting<br>FJV<br>consumption                                    | Cluster-<br>RCT                                                 | Computer-based<br>game for ten 25<br>min session for 5<br>weeks vs.<br>control (no<br>game)                                                                                                             | Servings of fruit,<br>100% juice, and<br>vegetable<br>consumption,<br>measured by the<br>Food Intake<br>Recording<br>Software<br>System<br>(FIRSS),<br>administered 4<br>days at baseline<br>and follow-up for<br>past 24hr dietary<br>recall (via<br>multimedia<br>program) | Intervention group<br>consumed 1.0 servings<br>of FJV more than<br>control group;<br>increases (mean<br>difference $\pm$ SE) in<br>servings of: fruit<br>(0.26 $\pm$ 0.05,p<0.001)<br>and 100% juice (0.06<br>$\pm$ 0.03,p<0.05) during<br>snacks and vegetables<br>(0.16 $\pm$ 0.05,p<0.01)<br>during lunch but no<br>other differences     | 2                |
| Dunton, G.<br>F., R.<br>Lagloire, et<br>al. (2009). | 16 middle<br>school<br>classrooms;<br>N = 683<br>students, 16<br>teachers,<br>(Mean =<br>12.47<br>(SD=.60);<br>53.5% male) | Video clips<br>as part of<br>program;<br><i>Exercise your<br/>Options</i> :<br>teacher-<br>delivered<br>physical<br>activity and<br>nutrition<br>curriculum | Nonexperi-<br>mental pre-<br>post<br>survey pilot<br>evaluation | Teacher<br>delivered<br>physical activity<br>and nutrition<br>curriculum with<br>video clips, 8<br>sessions with<br>booklet and<br>video clips/ post-<br>survey<br>immediately after<br>8 wk curriculum | Student survey<br>assessed<br>physical activity,<br>sedentary<br>behaviors,<br>nutrition<br>behaviors<br>measured via<br>YRBS (Youth<br>Risk Behavior<br>Surveillance<br>System) and<br>modified YRBS<br>items (student<br>survey)                                           | Increase of physical<br>activity (4.01 vs. 4.44<br>days/week; p<0.001),<br>daily dairy product<br>consumption (2.84 vs.<br>3.14; p=0.001);<br>Decrease in TV/DVD<br>watching (1.57 vs. 1.41<br>hr/day;<br>p=0.024),videogame<br>playing/nonschool-<br>related computer use<br>(1.68 vs. 1.37;p=0.002)<br>Decrease in daily<br>consumption of | 1                |

| Source/<br>year                        | Intervention<br>Setting/<br>Subjects                                    | Media<br>Structure                                                                                            | Research<br>Design | Intervention/<br>Follow-<br>up/Control                                                                                                                                                                                               | Outcomes                                                      | Results/<br>Conclusions                                                                                                                                                                                                                                                                                                                                                                                                                                                                              | Quality<br>Score |
|----------------------------------------|-------------------------------------------------------------------------|---------------------------------------------------------------------------------------------------------------|--------------------|--------------------------------------------------------------------------------------------------------------------------------------------------------------------------------------------------------------------------------------|---------------------------------------------------------------|------------------------------------------------------------------------------------------------------------------------------------------------------------------------------------------------------------------------------------------------------------------------------------------------------------------------------------------------------------------------------------------------------------------------------------------------------------------------------------------------------|------------------|
|                                        |                                                                         |                                                                                                               |                    |                                                                                                                                                                                                                                      |                                                               | sweets/sugars (4.17 vs. 3.44;p<0.001); no change in consumption of fruits (p=0.69) and vegetables (p=0.88)                                                                                                                                                                                                                                                                                                                                                                                           |                  |
| Goran, M. I. and K. Reynolds (2005)    | 4 grade schools; N=209 (ages 8.8-11.1, Mean = 9.5; 41% male)            | Computer game CD-ROM; <i>Impact</i> . Interactive educational learned game                                    | RCT-cluster design | Computer-based game for 8 wk sessions w/ 8 CD-ROM interactive lessons (45 min each), + 4 classroom lessons (45 min each) + 4 family-based assignments (45 min each) vs. control (educational CD-ROMs not related to health outcomes) | Physical activity, decrease sedentary behavior, change in BMI | Gender-by-treatment interactions for BMI z-score (p=0.016). BMI z-score adjusted mean value +/- SE after intervention: girls: 0.69 ± 0.04 (control) vs. 0.62 ± 0.04 (intervention) but not boys: 0.54 ± 0.05 (control) vs. 0.69 ± 0.05 (intervention); Gender-by-treatment interactions for % body fat (p=0.009). % body fat adjusted mean +/- SE after intervention: girls: 23.4 ± 0.4% (control) vs. 22.0 ± 0.4% (intervention) but not boys: 21.4 ± 0.5% (control) vs. 22.5 ± 0.5% (intervention) | 2                |
| Jago, R., T. Baranowski, et al. (2006) | 42 Boy Scouts Troop Meetings; N = 473 (ages 9-18, Mean = 13; 100% male) | Internet; <i>Fit for Life</i> . Physical activity badge included skill building activities at troop meetings, | RCT                | Internet-based program 2x wk for 9 wks, 1 & 6 mo f/u vs. control (fruit & vegetable intervention)                                                                                                                                    | Increase in physical activity                                 | Small marginally significant decrease in sedentary behavior (12 min/day) (p=0.051) and significant increased in light physical activity (p=0.011) between baseline and 1 month follow up (146.3 vs. 155.9 min/day) in wave                                                                                                                                                                                                                                                                           | 2                |

| Source/<br>year                                      | Intervention<br>Setting/<br>Subjects                                                       | Media<br>Structure                                                                                                                                                                  | Research<br>Design                                           | Intervention/<br>Follow-<br>up/Control                                                                      | Outcomes                                                                                                                                                                                                                                              | Results/<br>Conclusions                                                                                                                                                                                                                                                                                                                      | Quality<br>Score |
|------------------------------------------------------|--------------------------------------------------------------------------------------------|-------------------------------------------------------------------------------------------------------------------------------------------------------------------------------------|--------------------------------------------------------------|-------------------------------------------------------------------------------------------------------------|-------------------------------------------------------------------------------------------------------------------------------------------------------------------------------------------------------------------------------------------------------|----------------------------------------------------------------------------------------------------------------------------------------------------------------------------------------------------------------------------------------------------------------------------------------------------------------------------------------------|------------------|
|                                                      |                                                                                            | internet-<br>based role<br>modeling,<br>goal setting,<br>goal review<br>and problem<br>solving                                                                                      |                                                              |                                                                                                             |                                                                                                                                                                                                                                                       | 1 of study only                                                                                                                                                                                                                                                                                                                              |                  |
| Madsen, K.<br>A., S. Yen, et<br>al. (2007)           | Home; N=<br>30 (ages 9-<br>18, Mean =<br>13; 40%<br>male)                                  | Videogame;<br><i>Dance Dance<br/>Revolution</i> .<br>Interactive<br>dance<br>videogame                                                                                              | Pilot - pre<br>post test                                     | Videogame with<br>instructions to<br>use 30 min/d,<br>5d/wk for 2<br>months, 3 & 6<br>mo f/u                | Memory<br>card/self-report<br>for mins per<br>week activity                                                                                                                                                                                           | No association between<br>game play and BMI                                                                                                                                                                                                                                                                                                  | 0                |
| Moore, J. B.,<br>L. R.<br>Pawloski, et<br>al. (2009) | Schools; N<br>= 126 (ages<br>9-11; 36.5%<br>male)                                          | Internet<br>game; <i>Color<br/>My Pyramid<br/>Game</i> .<br>Interactive,<br>web-based<br>game which<br>teaches<br>children<br>about the<br>food pyramid<br>and physical<br>activity | Pretest-<br>posttest<br>quasi-<br>experi-<br>mental<br>pilot | Internet game for<br>6 classes over 3<br>mo period vs.<br>control (didactic<br>presentation of<br>game)     | Nutrition Self-<br>care practices<br>(Adolescent<br>Nutrition Self-<br>Care<br>Questionnaire<br>(ANSQ),<br>Physical Activity<br>Log (Student<br>Physical Activity<br>(SPA), and<br>Nutritional<br>Status<br>(Research<br>Anthropometric<br>Form (RA)) | Increase in pre- and<br>post-game measures of<br>in self-care behavior<br>(154.8 vs. 162.1;<br>Cohen's d=0.261),<br>physical activity,<br>min/day activity (31.4<br>vs. 60.1; Cohen's<br>d=0.598), and mean<br>systolic blood pressure<br>(113.9 vs. 108.0;<br>Cohen's d=0.578); no<br>changes in BMI (77.0<br>vs. 77.3, Cohen's<br>d=0.011) | 0                |
| Turnin, M. C.,<br>M. T. Tauber,<br>et al. (2001)     | 15 Primary<br>schools in<br>France; N =<br>1876 (ages<br>7-12, Mean<br>= 9; 47.5%<br>male) | Computer<br>game;<br><i>Alimentary<br/>my Dear Joe</i> .<br>Teaches kids<br>about<br>nutrition                                                                                      | RCT                                                          | Computer-based<br>game and<br>conventional<br>nutritional<br>teaching, 2<br>hrs/wk for 5 wks<br>vs. control | Dietary intake<br>assessed with<br>diet records                                                                                                                                                                                                       | No difference in caloric<br>intake (1899 control vs.<br>1896 intervention) more<br>carbohydrate (46.4%<br>vs. 45.7%, p<0.05),<br>less fat (37.1% vs.<br>37.6%, p<0.05), less                                                                                                                                                                 | 1                |

| Source/<br>year | Intervention<br>Setting/<br>Subjects | Media<br>Structure | Research<br>Design | Intervention/<br>Follow-<br>up/Control         | Outcomes | Results/<br>Conclusions                                                                                                                                                                | Quality<br>Score |
|-----------------|--------------------------------------|--------------------|--------------------|------------------------------------------------|----------|----------------------------------------------------------------------------------------------------------------------------------------------------------------------------------------|------------------|
|                 |                                      |                    |                    | (conventional<br>nutritional<br>teaching only) |          | protein (16.5% vs.<br>16.7%, p<0.05), less<br>saccharose (11.5% vs.<br>12.2%, p<0.001), more<br>calcium (771mg vs.<br>731mg, p<0.001) and<br>more fiber (12.6mg vs.<br>12.1mg, p<0.05) |                  |

### Asthma/Lung Function

|                                                         |                                                                                                                                     |                                                                                                                                            |                                                                    |                                                                                                                       |                                                                                                                                                                 |                                                                                                                                                                                                                                                                                                                                                                                                                                                                                                                                                                                                                       |   |
|---------------------------------------------------------|-------------------------------------------------------------------------------------------------------------------------------------|--------------------------------------------------------------------------------------------------------------------------------------------|--------------------------------------------------------------------|-----------------------------------------------------------------------------------------------------------------------|-----------------------------------------------------------------------------------------------------------------------------------------------------------------|-----------------------------------------------------------------------------------------------------------------------------------------------------------------------------------------------------------------------------------------------------------------------------------------------------------------------------------------------------------------------------------------------------------------------------------------------------------------------------------------------------------------------------------------------------------------------------------------------------------------------|---|
| Bartholomew,<br>L. K., R. S.<br>Gold, et al.<br>(2000). | 4 Hospital-<br>based clinic<br>and<br>community<br>pediatric<br>practices; N<br>= 133 (ages<br>7-17, Mean<br>= 11.5;<br>64.7% male) | Computer<br>game;<br>Watch,<br>Discover,<br>Think and<br>Act. Player<br>makes<br>choices to<br>manage the<br>game<br>character's<br>asthma | Pretest-<br>posttest<br>random-<br>ized<br>interven-<br>tion trial | Computer-based<br>asthma game<br>played at visits<br>(40 mins) vs.<br>control (usual<br>care); 4 to 15.6<br>month f/u | Child Asthma<br>Self-<br>Management;<br>Clinic<br>Appointment<br>Return Rate;<br>Asthma<br>symptoms;<br>Functional<br>status,<br>hospitalizations,<br>ED visits | Differences in pre- and<br>post-test results<br>between intervention<br>and control groups:<br>Effect sizes: Child Self-<br>Management = 0.44;<br>Emergency visits =<br>0.03; Hospitalizations =<br>-0.14; Clinic<br>appointment return rate<br>was 71% (intervention)<br>vs. 60% (control)<br>(p=0.04). Intervention<br>effect on symptoms<br>with intervention<br>subjects having lower<br>symptoms scores at<br>post test, moderated by<br>severity of asthma<br>(t(116) = -1.96; p=0.02),<br>slight improvement in<br>functional status scores<br>at 8 months (139.6 vs.<br>137.3); no difference in<br>ED visits | 2 |
|---------------------------------------------------------|-------------------------------------------------------------------------------------------------------------------------------------|--------------------------------------------------------------------------------------------------------------------------------------------|--------------------------------------------------------------------|-----------------------------------------------------------------------------------------------------------------------|-----------------------------------------------------------------------------------------------------------------------------------------------------------------|-----------------------------------------------------------------------------------------------------------------------------------------------------------------------------------------------------------------------------------------------------------------------------------------------------------------------------------------------------------------------------------------------------------------------------------------------------------------------------------------------------------------------------------------------------------------------------------------------------------------------|---|

| Source/<br>year                                | Intervention<br>Setting/<br>Subjects                                                             | Media<br>Structure                                                                                                                                              | Research<br>Design                                                                      | Intervention/<br>Follow-<br>up/Control                                                                                                                                       | Outcomes                                                                                            | Results/<br>Conclusions                                                                                                                                                                                                                                                | Quality<br>Score |
|------------------------------------------------|--------------------------------------------------------------------------------------------------|-----------------------------------------------------------------------------------------------------------------------------------------------------------------|-----------------------------------------------------------------------------------------|------------------------------------------------------------------------------------------------------------------------------------------------------------------------------|-----------------------------------------------------------------------------------------------------|------------------------------------------------------------------------------------------------------------------------------------------------------------------------------------------------------------------------------------------------------------------------|------------------|
| Huss, K., M. Winkelstein, et al. (2003)        | Home; N=148 (ages 7-12, Mean = 9.6; 44% male)                                                    | <i>Computer game; Wee Willie Wheezie</i> , boy with asthma maneuvers through various homelike settings while attempting to avoid asthma allergens and irritants | RCT                                                                                     | Computer-based asthma game and conventional education (written asthma materials and non-asthma related computer game) vs. control (conventional education only); 12 week f/u | Change in asthma symptoms                                                                           | No significant changes in asthma symptoms                                                                                                                                                                                                                              | 3                |
| McPherson, A. C., C. Glazebrook, et al. (2006) | Hospital-based clinic; N = 101 (ages 7-14; 53% male)                                             | <i>Computer game; Asthma Files</i> . Interactive game with secret-agent theme                                                                                   | RCT                                                                                     | Computer-based game + booklet, 90 mins vs. control (asthma booklet only); 1 and 6 month follow up                                                                            | Oral steroid use, School absence, GP visits, or hospital visits                                     | 1 month: no significant differences in school absence, GP visits, hospital admissions. 6 months: intervention group had lower use of oral steroids (OR 2.96, 95% CI 1.014-8.612, p=0.03) and lower percent reporting any school absence (OR 2.394, 95% CI 1.021-5.618) | 3                |
| Rubin, D. H., J. M. Leventhal, et al. (1986)   | Hospital based clinics, private office, and HMO; N = 65 (ages 7-12, Mean = 9.5-9.7; 53-58% male) | Computer game, <i>Asthma Command</i> ; Players use knowledge of asthma to maneuver through obstacles in                                                         | RCT single blind trial (researchers and physicians were blinded to treatment condition) | Computer-based game, 45 min session every 6 wks for 10 mos vs. control (computer game not related to asthma)                                                                 | Asthma self management, acute visits due to asthma, Hospital days due to asthma, school days absent | Higher asthma behavioral child assessment score (mean $\pm$ SD) in intervention (64.1 $\pm$ 7.7) vs. control (57.8 $\pm$ 8.8) (p=0.008); no differences in morbidity data (doctor's visits, hospitalizations, school                                                   | 3                |

| Source/<br>year                               | Intervention<br>Setting/<br>Subjects                     | Media<br>Structure                                                                                                                                                                                                                | Research<br>Design                          | Intervention/<br>Follow-<br>up/Control                                                                                                                          | Outcomes                                                                                                                                                                                             | Results/<br>Conclusions                                                                                                                                                                                                                                                                         | Quality<br>Score |
|-----------------------------------------------|----------------------------------------------------------|-----------------------------------------------------------------------------------------------------------------------------------------------------------------------------------------------------------------------------------|---------------------------------------------|-----------------------------------------------------------------------------------------------------------------------------------------------------------------|------------------------------------------------------------------------------------------------------------------------------------------------------------------------------------------------------|-------------------------------------------------------------------------------------------------------------------------------------------------------------------------------------------------------------------------------------------------------------------------------------------------|------------------|
|                                               |                                                          | game and<br>score points                                                                                                                                                                                                          |                                             |                                                                                                                                                                 |                                                                                                                                                                                                      | days absent)                                                                                                                                                                                                                                                                                    |                  |
| Shames, R.<br>S., P. Sharek,<br>et al. (2004) | Home; N<br>=119 (ages<br>5-12; 57.9%<br>male)            | Videogame<br>on Super<br>Nintendo;<br>Bronkie's<br>Asthma<br>Adventure                                                                                                                                                            | RCT (no<br>blinding)                        | Disease<br>management<br>program<br>including asthma<br>videogame, f/up<br>at 8, 32, 52<br>weeks vs.<br>control (usual<br>care plus<br>commercial<br>videogame) | Primary:<br>Frequency of<br>asthma<br>symptoms days<br>Secondary: No<br>wheezing days<br>in past 2 mo;<br>asthma attacks<br>in past 2 mo;<br>days used<br>rescue inhaler; #<br>urgent care<br>visits | No change in days with<br>asthma symptoms at 8,<br>32, or 52 weeks<br>(p=0.06). No difference<br>in any of other clinical<br>outcomes. Intervention<br>associated with higher<br>scores in physical QOL<br>measures at weeks 32<br>(score 78 vs. 59<br>p<0.05) and 52 (79.9<br>vs. 69.9 P<0.05) | 2                |
| Vilozni, D., M.<br>Barker, et al.<br>(2001)   | Kindergarte<br>n class;<br>N=112<br>(ages 3-6;<br>43.7%) | Computer<br>Game;<br><i>SpiroGame</i> .<br>Teaches<br>child who is<br>undergoing<br>testing to<br>differentiate<br>between<br>inhalation<br>and<br>exhalation.<br>And teaches<br>an FVC<br>(forced vital<br>capacity)<br>maneuver | RCT (no<br>blinding)<br>with cross-<br>over | Computer-based<br>game for 1<br>session of 5-10<br>min of gameplay<br>vs. control<br>(MasterLab<br>System: candle-<br>blowing<br>simulation for 3<br>to 7 min)  | Performance on<br>spirometry                                                                                                                                                                         | Successful spirometry<br>was achieved by 69.6%<br>SpiroGame vs. 47.1%<br>of control (p=0.002);<br>FEV1 values achieved<br>by 79% with Spirogram<br>but 4% with candle-<br>blowing                                                                                                               | 2                |

### Safety Behaviors

| Source/<br>year                                         | Intervention<br>Setting/<br>Subjects                                                             | Media<br>Structure                                                                                                                                                     | Research<br>Design                                                                                                                                                | Intervention/<br>Follow-<br>up/Control                                                                                                                                | Outcomes                                                                                                                                                                                         | Results/<br>Conclusions                                                                                                                                                                                                                                                                                                                                                                                                                                                               | Quality<br>Score |
|---------------------------------------------------------|--------------------------------------------------------------------------------------------------|------------------------------------------------------------------------------------------------------------------------------------------------------------------------|-------------------------------------------------------------------------------------------------------------------------------------------------------------------|-----------------------------------------------------------------------------------------------------------------------------------------------------------------------|--------------------------------------------------------------------------------------------------------------------------------------------------------------------------------------------------|---------------------------------------------------------------------------------------------------------------------------------------------------------------------------------------------------------------------------------------------------------------------------------------------------------------------------------------------------------------------------------------------------------------------------------------------------------------------------------------|------------------|
| Coles, C. D.,<br>D. C.<br>Strickland, et<br>al. (2007). | Hospital-<br>based clinic;<br>N = 32<br>(ages 4-10,<br>Mean = 6.9<br>(SD = 1.78),<br>65.5% male) | Computer<br>game; Fire<br>and street<br>safety game                                                                                                                    | Pilot -<br>Randomize<br>d, single<br>blind<br>pre/post<br>within and<br>between<br>group<br>analysis                                                              | Computer-based<br>game play,<br>game play until<br>mastery of skills<br>(<30 min) f/up at<br>1 wk                                                                     | Street and fire<br>safety behavior<br>skills                                                                                                                                                     | 87.5% of subjects were<br>able to perform three<br>out of four steps<br>correctly immediately<br>following the learning<br>session on fire safety<br>skills and 81.3% on<br>street safety skills. At<br>one week post<br>intervention, 81.3%<br>were able to perform<br>three out of four steps<br>correctly on fire safety<br>skills, and 75.1% of<br>street safety skills                                                                                                           | 1                |
| Fisher, D. L.,<br>N. E. Laurie,<br>et al. (2002)        | Driver's<br>education<br>course;<br>N=45 (ages<br>16-17, % of<br>male not<br>stated)             | Computer<br>simulator<br>program;<br><i>Driver ZED</i><br>(Zero Errors<br>Driving). Risk<br>awareness<br>training<br>program<br>evaluated on<br>a driving<br>simulator | Experiment<br>comparing<br>the<br>perform-<br>ance of<br>trained<br>young<br>drivers to<br>untrained<br>young<br>drivers and<br>older<br>experien-<br>ced drivers | Computer-based<br>young driver risk<br>awareness<br>training program<br>and driving<br>simulator "Driver<br>ZED", 1 1/2 hr<br>session vs.<br>control (no<br>training) | Driving<br>performance on<br>simulator (three<br>virtual worlds,<br>each for 5 miles;<br>12 pairs of<br>scenarios, 4 of<br>which appeared<br>in each<br>database) --<br>report on 6<br>scenarios | Training improved the<br>driving skills of younger<br>inexperienced drivers.<br>The authors rejected<br>the hypothesis that the<br>number of trained<br>young drivers who<br>applied their brakes<br>was attributable to<br>chance ( $p < 0.025$ ). They<br>rejected the hypothesis<br>that the number of<br>experienced drivers<br>who applied their<br>brakes opposite a truck<br>was attributable simply<br>to chance ( $p < 0.05$ ), this<br>did not persist for<br>young drivers | 0                |

| Source/<br>year                              | Intervention<br>Setting/<br>Subjects              | Media<br>Structure                                                                                                                    | Research<br>Design     | Intervention/<br>Follow-<br>up/Control                                    | Outcomes                    | Results/<br>Conclusions                                                                                                                                            | Quality<br>Score |
|----------------------------------------------|---------------------------------------------------|---------------------------------------------------------------------------------------------------------------------------------------|------------------------|---------------------------------------------------------------------------|-----------------------------|--------------------------------------------------------------------------------------------------------------------------------------------------------------------|------------------|
| Padgett, L. S., D. Strickland, et al. (2006) | Hospital-based clinic; N = 5 (ages 5-7, 80% male) | Computer game; Fire safety game to accommodate the verbal strengths and visual-spatial and fine motor weaknesses of children with FAS | Pretest-posttest pilot | Computer-based game, game play until mastery of skills, follow up at 1 wk | Fire safety behavior skills | Immediately post-intervention, all children reached 100% accuracy on completing each of three safety steps in both real world simulation and picture sequence test | 0                |

#### Sexual Risk Behaviors

|                                           |                                                                                                                                |                                                      |     |                                                                                                                                                          |                                                                                                                                                                                                                                                                                          |                                                                                                                                                                                                                                                                                                                                                                                                                                                            |   |
|-------------------------------------------|--------------------------------------------------------------------------------------------------------------------------------|------------------------------------------------------|-----|----------------------------------------------------------------------------------------------------------------------------------------------------------|------------------------------------------------------------------------------------------------------------------------------------------------------------------------------------------------------------------------------------------------------------------------------------------|------------------------------------------------------------------------------------------------------------------------------------------------------------------------------------------------------------------------------------------------------------------------------------------------------------------------------------------------------------------------------------------------------------------------------------------------------------|---|
| Downs, J. S., P. J. Murray, et al. (2004) | 4 Hospital-based adolescent clinics and two community practices and a women's teaching hospital; N = 300 (ages 14-18; 0% male) | Interactive video. Video with still material on STIs | RCT | Interactive video about STIs, f/u at 1, 3, and 6 mos vs. Two controls (content matched 127 page book vs. topic-matched commercially available brochures) | Sexual risk behaviors (self-report -sexual behavior in the previous 3 months: 1) # sexual partners; 2) condom use frequency; 3) correct condom use; STI acquisition (self-report; Ct via PCR assay based on self-administered introital swabs) (assessed at 3, 6 months; Ct at 6 months) | Complete abstinence more likely in video group from baseline to 3 months (OR=2.50, p=0.027), but did not persist over time (OR=1.45, p=0.344). No difference in how condoms were used at 3 (p=0.57) or 3-6 months (p=0.15), but trend towards more condom use among the video group. Condom failures: no significant difference b/t conditions from baseline to 3 month visit (p=0.05), between 3-6 months, those in the video group reported fewer condom | 3 |
|-------------------------------------------|--------------------------------------------------------------------------------------------------------------------------------|------------------------------------------------------|-----|----------------------------------------------------------------------------------------------------------------------------------------------------------|------------------------------------------------------------------------------------------------------------------------------------------------------------------------------------------------------------------------------------------------------------------------------------------|------------------------------------------------------------------------------------------------------------------------------------------------------------------------------------------------------------------------------------------------------------------------------------------------------------------------------------------------------------------------------------------------------------------------------------------------------------|---|

| Source/<br>year                                | Intervention<br>Setting/<br>Subjects                   | Media<br>Structure                                                                                                                                                                                                                                      | Research<br>Design | Intervention/<br>Follow-<br>up/Control                                                                                                                                                                              | Outcomes                                     | Results/<br>Conclusions                                                                                                                                                                                                                                                                                                                                                                    | Quality<br>Score |
|------------------------------------------------|--------------------------------------------------------|---------------------------------------------------------------------------------------------------------------------------------------------------------------------------------------------------------------------------------------------------------|--------------------|---------------------------------------------------------------------------------------------------------------------------------------------------------------------------------------------------------------------|----------------------------------------------|--------------------------------------------------------------------------------------------------------------------------------------------------------------------------------------------------------------------------------------------------------------------------------------------------------------------------------------------------------------------------------------------|------------------|
|                                                |                                                        |                                                                                                                                                                                                                                                         |                    |                                                                                                                                                                                                                     |                                              | failures compared to controls (p=0.02). Control condition were more likely to report an STI diagnosis in general (OR=2.79, p=0.05) and chlamydia infection specifically (OR7.75, p=0.05). Clinical lab test to detect chlamydia was underpowered                                                                                                                                           |                  |
| Tortolero, S. R., C. M. Markham, et al. (2010) | 10 middle schools; ; N = 907 (Mean age = 13, 61% male) | Computer based program; <i>It's Your Game, Keep it Real</i> . Integrates group based and individual activities on laptop computers. Computer component contains virtual world interface, educational activities that target determinants of risk taking | RCT                | Curriculum, <i>It's Your Game: Keep it Real</i> , with computer based activities, 12 lessons (45 minutes per lesson); 6 parent-child homework activities vs. control (regular health classes); f/u in the 9th grade | Self-reported sexual initiation by 9th grade | The control group was more likely to have initiated oral, vaginal, or anal sex by the 9th grade (29.9% vs. 23.4%, ARR 1.29; 95% CI: 1.02-1.64 than the intervention group; The control group was more likely to have initiated oral sex (17.6% vs. 10%, ARR 1.76; 95% CI: 1.21-2.56) or anal sex (9.9% vs. 3.7%, ARR 2.67; 95% CI: 1.45-4.94) by the 9th grade than the intervention group | 3                |

**Diabetes**

| Source/<br>year                                       | Intervention<br>Setting/<br>Subjects                                                                                    | Media<br>Structure                                                                               | Research<br>Design | Intervention/<br>Follow-<br>up/Control                                                                                                                  | Outcomes                                                                       | Results/<br>Conclusions                                                                                                                                                       | Quality<br>Score |
|-------------------------------------------------------|-------------------------------------------------------------------------------------------------------------------------|--------------------------------------------------------------------------------------------------|--------------------|---------------------------------------------------------------------------------------------------------------------------------------------------------|--------------------------------------------------------------------------------|-------------------------------------------------------------------------------------------------------------------------------------------------------------------------------|------------------|
| Brown, S. J.,<br>D. A.<br>Lieberman, et<br>al. (1997) | Hospital-<br>based Clinic<br>and Kaiser<br>Permanente<br>clinic; N =<br>59 (ages 8-<br>16, % of<br>males not<br>stated) | Videogame<br>on Super<br>Nintendo;<br><i>Packy and<br/>Marlon</i> .<br>Challenges<br>on diabetes | RCT                | Videogame play<br>occurring at<br>home<br>(unrestricted<br>game play) f/up<br>at 3 and 6 mos<br>vs. control game<br>with no health<br>content (pinball) | Diabetes self-<br>care, health<br>outcomes<br>(urgent doctor<br>visits, HbA1c) | No significant<br>differences between<br>intervention (-0.43)and<br>control (0.04) in mean<br>difference of urgent<br>visits for diabetes-<br>related problems in<br>(p=0.08) | 1                |
